# Supplementary material for: Tetralogy of Fallot
Source: Springer Nature journal article supplement (doi:10.1186/1750-1172-4-2), 2009-01-13
Supplement: 13023_2008_136_MOESM1_ESM.pdf [file 13023_2008_136_MOESM1_ESM.pdf]

**Subpulmonary stenosis**

This anatomical dissection shows the internal structures of the heart. The aorta is seen originating from the right ventricle, a condition known as overriding aorta. The pulmonary valve is narrowed, indicating subpulmonary stenosis. A hole in the ventricular septum is visible, representing a ventricular septal defect. The right ventricle is significantly enlarged and thick-walled, demonstrating right ventricular hypertrophy. The left ventricle is also visible, appearing smaller in size compared to the hypertrophied right ventricle.

**Overriding aorta**

**Ventricular septal defect**

**Right ventricular hypertrophy**
