# Supplementary material for: Tetralogy of Fallot
Source: Springer Nature journal article supplement (doi:10.1186/1750-1172-4-2), 2009-01-13

**Ventriculo-infundibular fold**

**Septoparietal  
trabeculations**

**Septomarginal trabeculation**

**Aortic-tricuspid continuity**

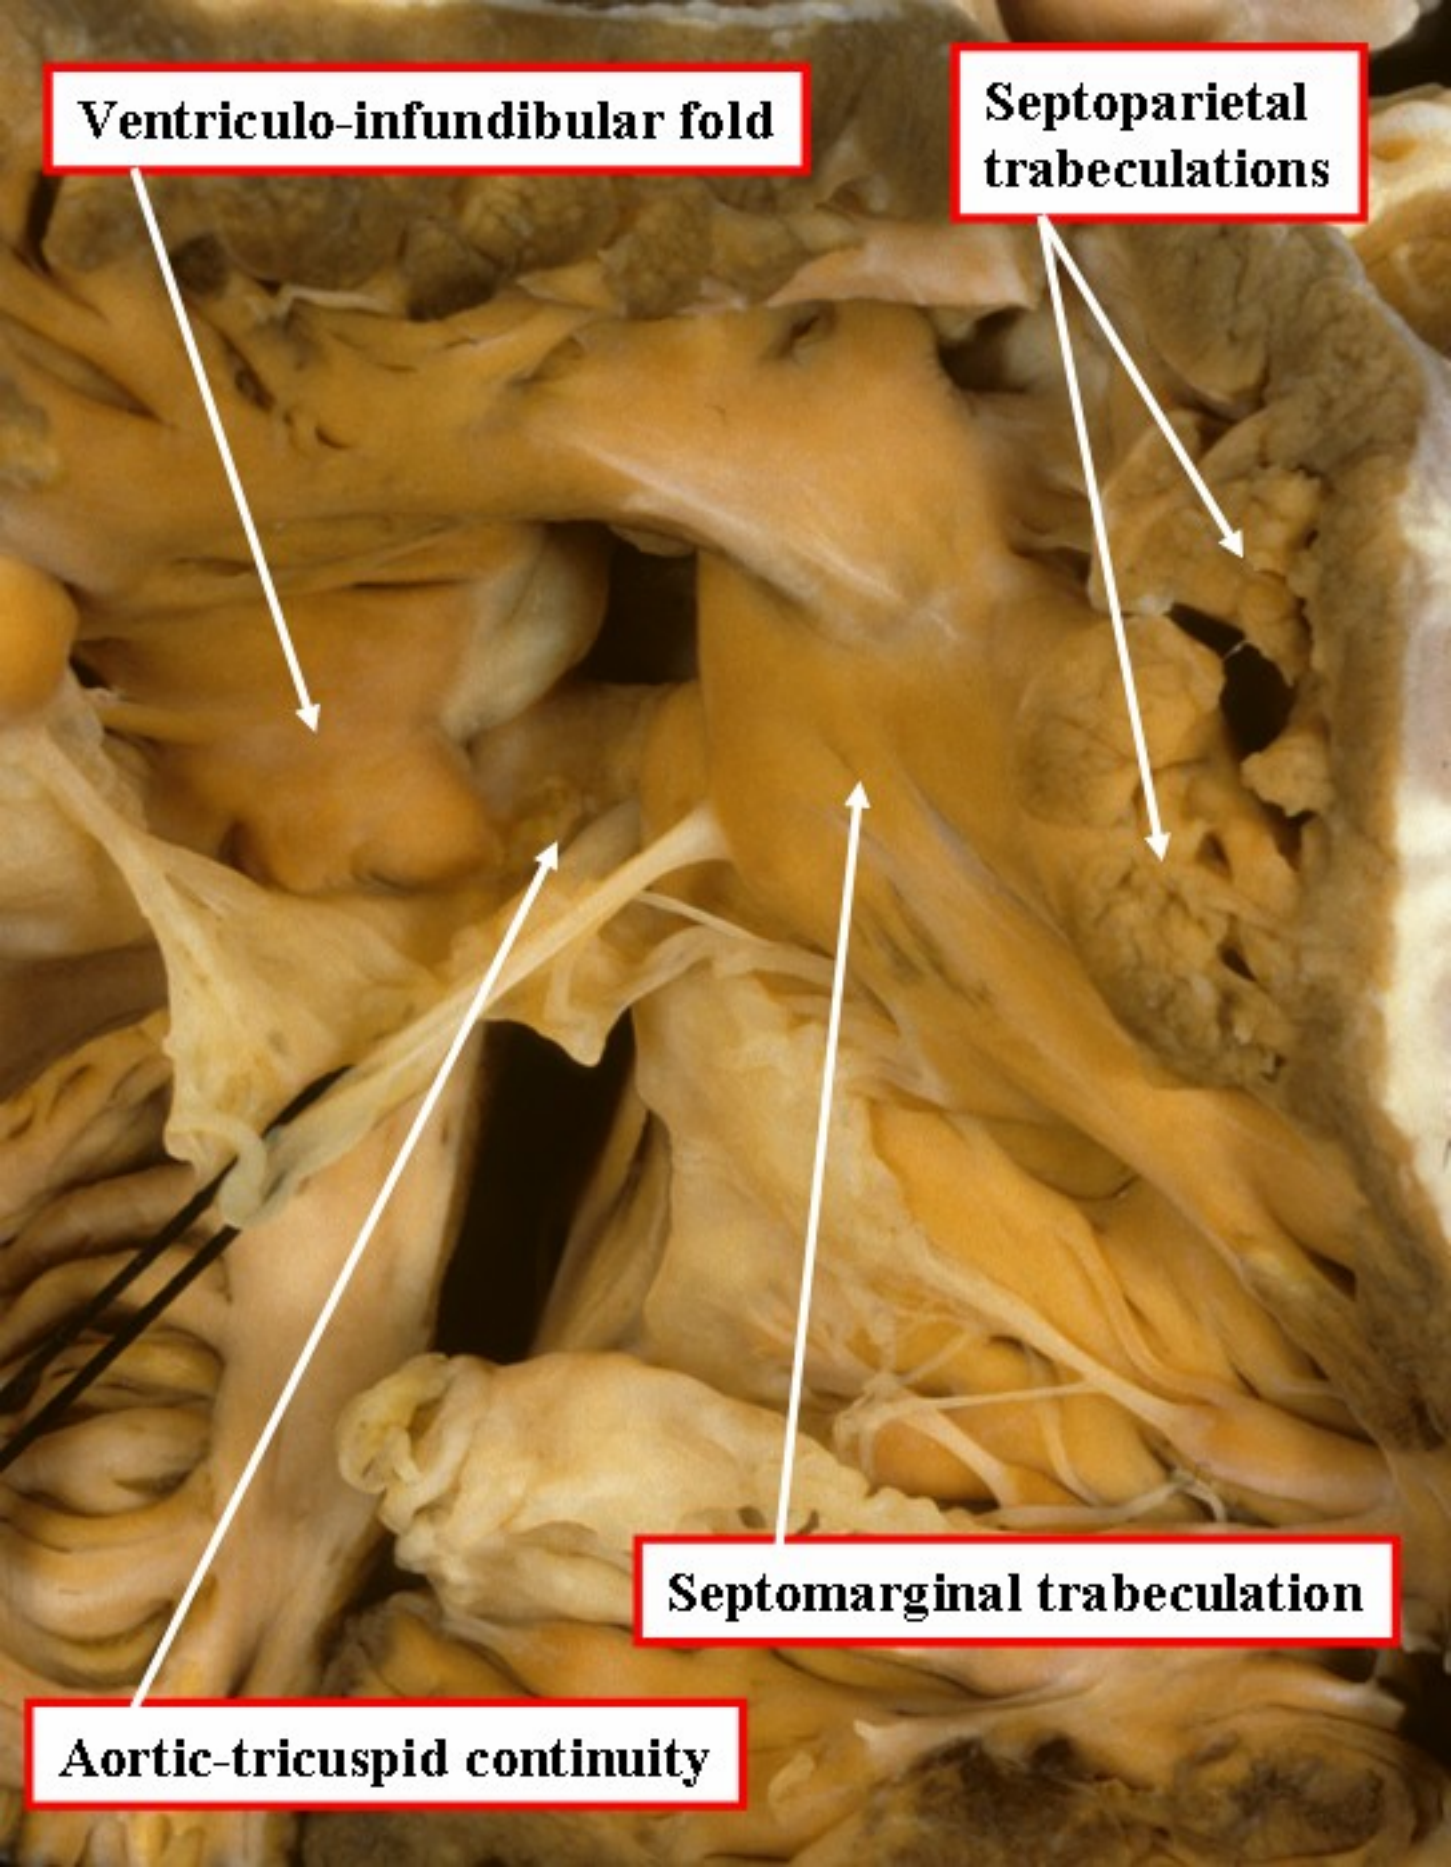

Supplement: 13023_2008_136_MOESM2_ESM.pdf [file 13023_2008_136_MOESM2_ESM.pdf]
