# Supplementary material for: Tetralogy of Fallot
Source: Springer Nature journal article supplement (doi:10.1186/1750-1172-4-2), 2009-01-13

**Systemic-to-pulm. collateral arteries**

**Pulmonary arteries**

**Pulmonary atresia**

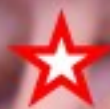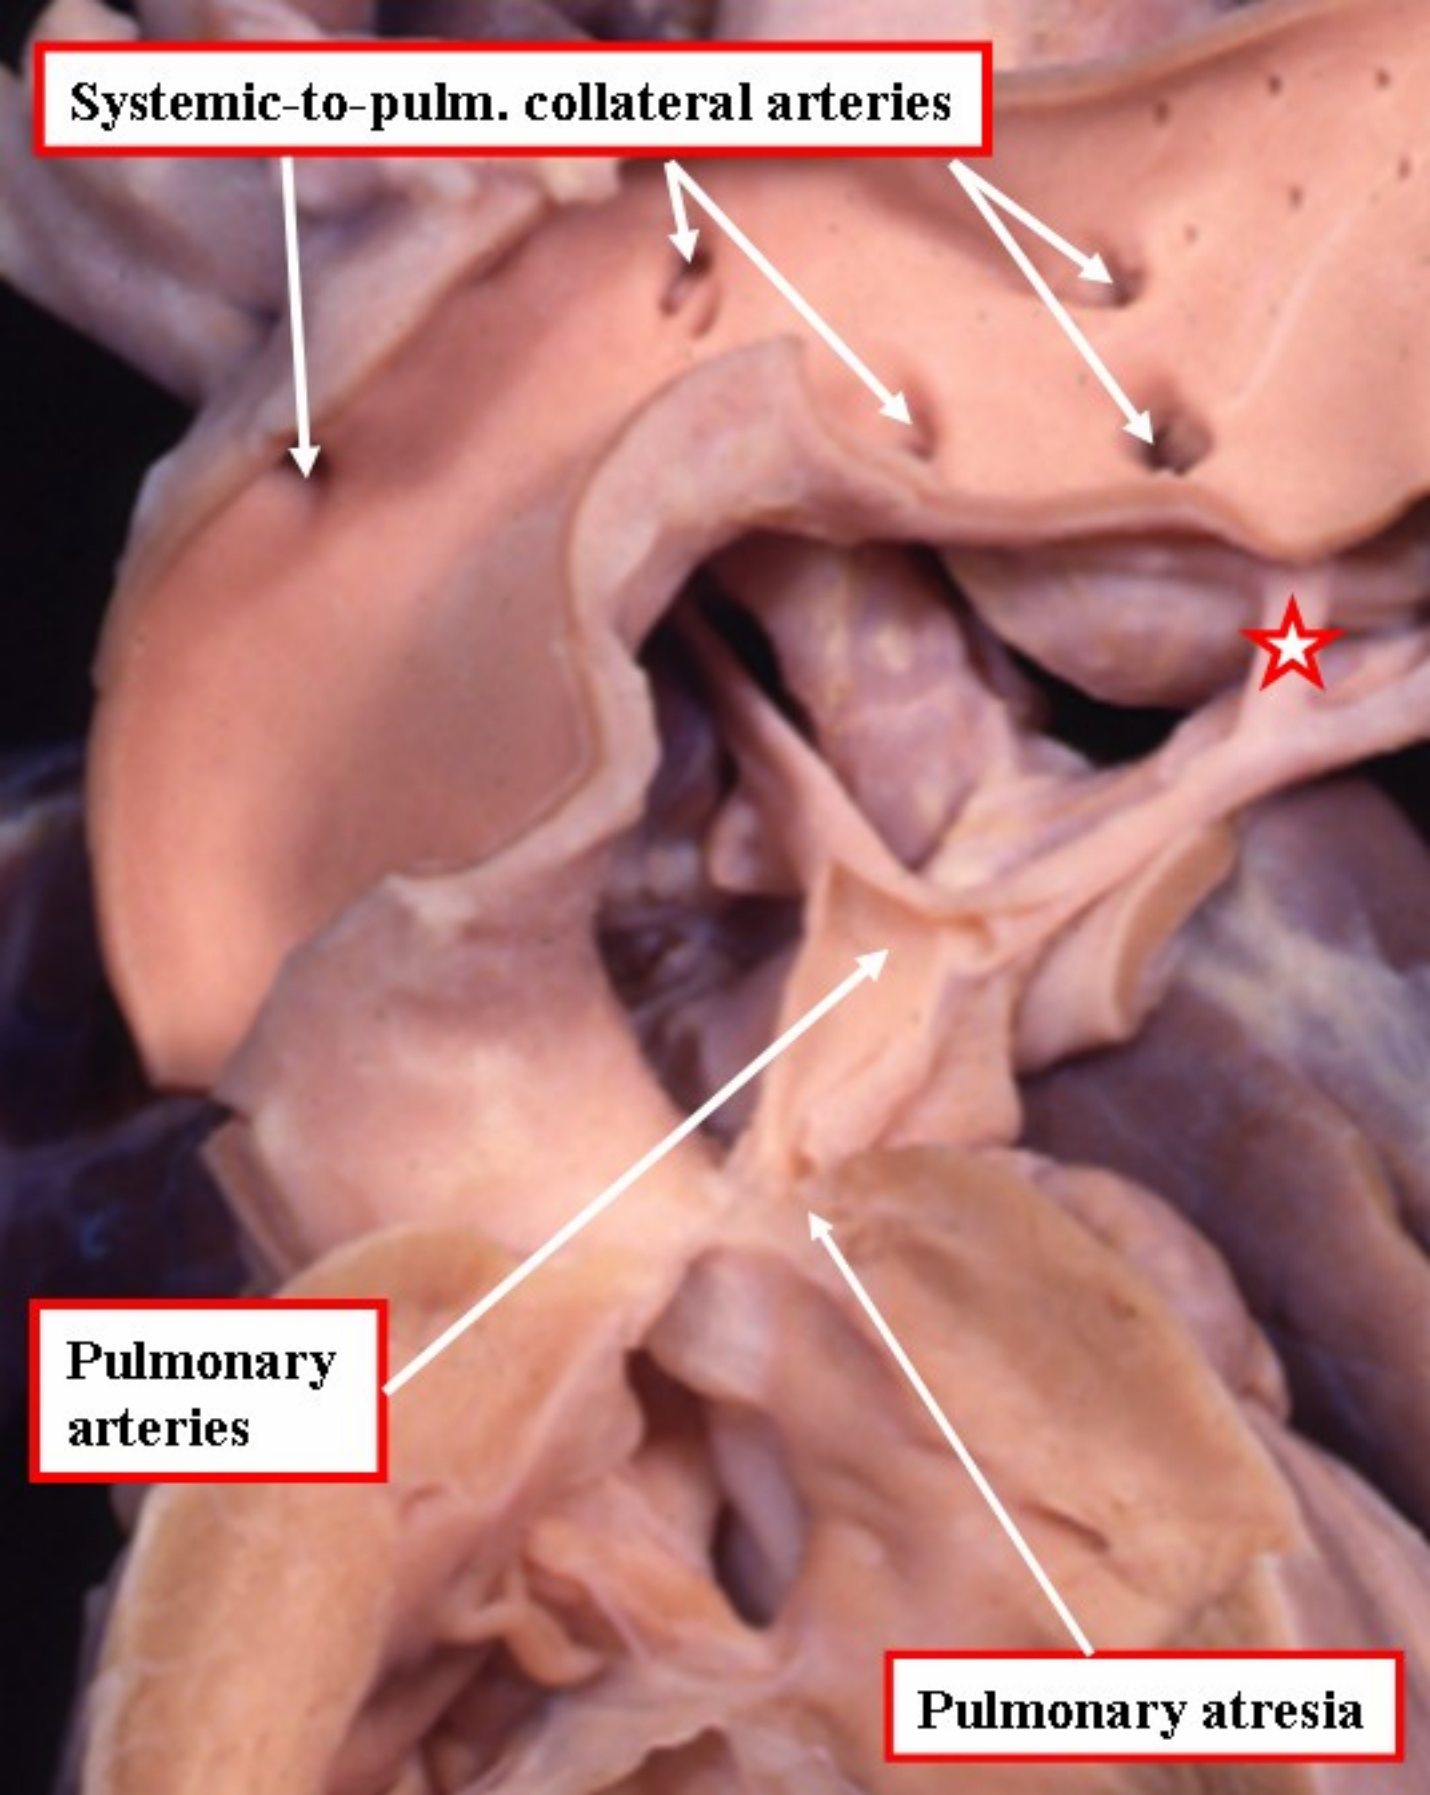

Supplement: 13023_2008_136_MOESM5_ESM.pdf [file 13023_2008_136_MOESM5_ESM.pdf]
